# Supplementary material for: Enantioselective regulation of a metal complex in reversible binding to serum albumin: dynamic helicity inversion signalled by circularly polarised luminescence
Source: Royal Society of Chemistry journal article supplement (doi:10.1039/b810978h), 2008-01-01
Supplement: b810978h.pdf [file b810978h.pdf]

## ESI

*Parker et al Chem Commun 2008 B810978H*

### **Enantioselective regulation of a metal complex in reversible binding to serum albumin: dynamic helicity inversion signalled by circularly polarised luminescence**

*Craig P. Montgomery, Elizabeth J. New, David Parker\* and Robert D. Peacock*

#### **1. Experimental**

Details of luminescence, CPL and MR instrumentation may be traced through references 11 and 12.

For (SSS)- $\Delta$ -[Tb.L<sup>1a</sup>]<sup>3+</sup>, at 545 nm the  $g_{lum}$  value is + 0.27 (Figure 2 ESI and main text, Figure 2); for (SSS)- $\Delta$ -[Eu.L<sup>1a</sup>]<sup>3+</sup>, the  $g_{lum}$  values at 589 and 595 nm are + 0.19 and - 0.16 respectively (Fig. 1 ESI and Fig. 3 main text). These allow calibration of the other transitions observed in these and related Figures. The scale used in each CPL figure in the ESI refers to ( $I_L - I_R$ ) and is on a scale of x60 with respect to ( $I_L + I_R$ ).

#### **2. List of Supplementary Figures**

##### *Figure 1*

Mirror image CPL spectra for (SSS)- $\Delta$ -[Eu.L<sup>1a</sup>]<sup>3+</sup> and (RRR)- $\Lambda$ -[Eu.L<sup>2a</sup>]<sup>3+</sup>; (red = ( $\Delta$ ), blue = ( $\Lambda$ ); 295K, D<sub>2</sub>O, 15 $\mu$ M)

##### *Figure 2*

Mirror image CPL spectra for (SSS)- $\Delta$ -[Tb.L<sup>1a</sup>]<sup>3+</sup> and (RRR)- $\Lambda$ -[Tb.L<sup>2a</sup>]<sup>3+</sup>; (red = ( $\Delta$ ), blue = ( $\Lambda$ ); 295K, D<sub>2</sub>O, 15 $\mu$ M)

##### *Figure 3*

CPL spectra for (RRR)- $\Lambda$ -[Eu.L<sup>2a</sup>]<sup>3+</sup>; (295K, D<sub>2</sub>O, 15 $\mu$ M) in the presence and absence of one equivalent of BSA (blue = without; green = with BSA)

##### *Figure 4*

CPL spectra for (RRR)- $\Lambda$ -[Tb.L<sup>2a</sup>]<sup>3+</sup>; (295K, D<sub>2</sub>O, 15 $\mu$ M) in the presence and absence of one equivalent of BSA (blue = without; green = with BSA)

##### *Figure 5*

CPL spectra for (SSS)- $\Delta$ -[Tb.L<sup>1b</sup>]<sup>3+</sup>; (295K, D<sub>2</sub>O, 15 $\mu$ M) in the presence and absence of one equivalent of BSA (red = without; green = with BSA)

*Figure 6*

CPL spectra for (SSS)- $\Delta$ -[Eu.L<sup>3</sup>]<sup>3+</sup>; (295K, D<sub>2</sub>O, 15 $\mu$ M) in the presence and absence of 10 equivalents of BSA (red = without; green = with BSA)

*Figure 7*

CPL spectra for (RRR)- $\Lambda$ -[Tb.L<sup>3</sup>]<sup>3+</sup>; (295K, D<sub>2</sub>O, 15 $\mu$ M) in the presence and absence of 10 equivalents of BSA (blue = without; green = with BSA)

*Figure 8*

CPL spectra for (SSS)- $\Delta$ -[Tb.L<sup>5</sup>]<sup>3+</sup>; (295K, D<sub>2</sub>O, 15 $\mu$ M) in the presence and absence of 10 equivalents of BSA (red = without; green = with BSA); ligand L<sup>5</sup> replaces the dpqC chromophore in L<sup>1</sup> (bidentate moiety) for a unidentate 2-methyl-aza-xanthone moiety, and in this complex the macrocyclic ligand is octadentate and one water molecule is bound in an axial site<sup>13</sup>

*Figure 9*

Variation of the observed dissymmetry factor,  $g_{em}$ , with added BSA for (SSS)- $\Delta$ -[Eu.L<sup>1a</sup>]<sup>3+</sup>; (295K, D<sub>2</sub>O, 15 $\mu$ M); (blue triangles = 589 nm, red squares = 593 nm).

*Figure 10*

Variation of the measured relaxivity of (SSS)- $\Delta$ -[Gd.L<sup>1a</sup>]<sup>3+</sup> and (RRR)- $\Lambda$ -[Gd.L<sup>2a</sup>]<sup>3+</sup>; (310K, D<sub>2</sub>O, 1.6 mM complex) as a function of added HSA (Red triangles = ( $\Delta$ ), blue squares = ( $\Lambda$ )).

*Figure 11*

Variation of the measured relaxivity of (SSS)- $\Delta$ -[Gd.L<sup>1a</sup>]<sup>3+</sup> and (RRR)- $\Lambda$ -[Gd.L<sup>2a</sup>]<sup>3+</sup>; (310K, D<sub>2</sub>O, 1.6 mM complex) as a function of added warfarin (Red triangles = ( $\Delta$ ), blue squares = ( $\Lambda$ )).

*Figure 12*

Total emission spectra for (SSS)- $\Delta$ -[Eu.L<sup>1a</sup>]<sup>3+</sup>; (295K, D<sub>2</sub>O, 15 $\mu$ M) in the presence (red; scaled x 3) and absence (blue) of 10 equivalents of BSA.

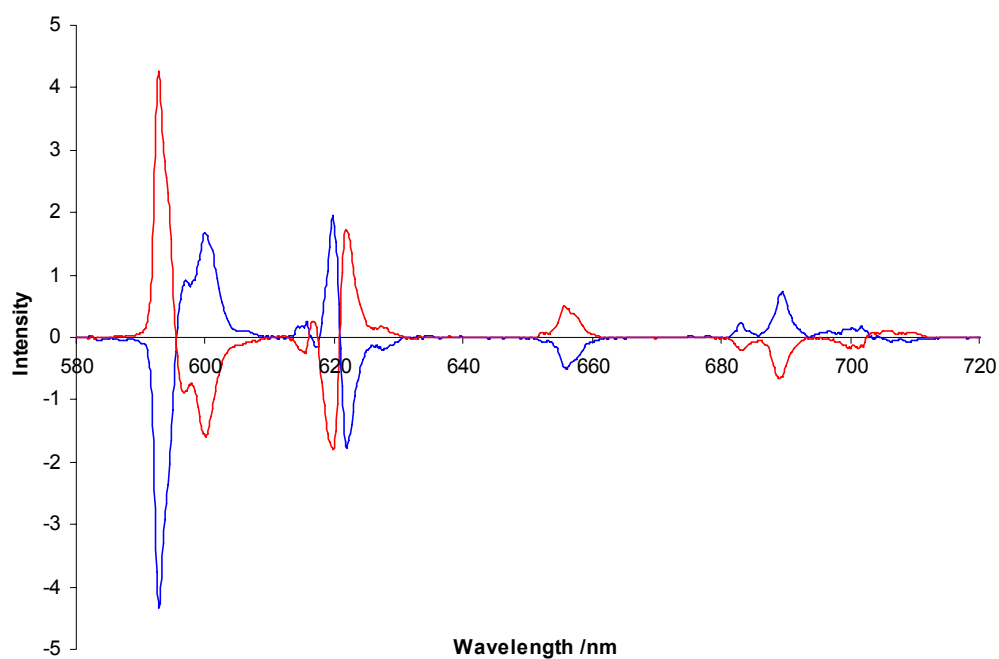

Figure 1 (above)

Mirror image CPL spectra for (SSS)- $\Delta$ -[Eu.L<sup>1a</sup>]<sup>3+</sup> and (RRR)- $\Lambda$ -[Eu.L<sup>2a</sup>]<sup>3+</sup>; (red = ( $\Delta$ ), blue = ( $\Lambda$ ); 295K, D<sub>2</sub>O, 15 $\mu$ M)

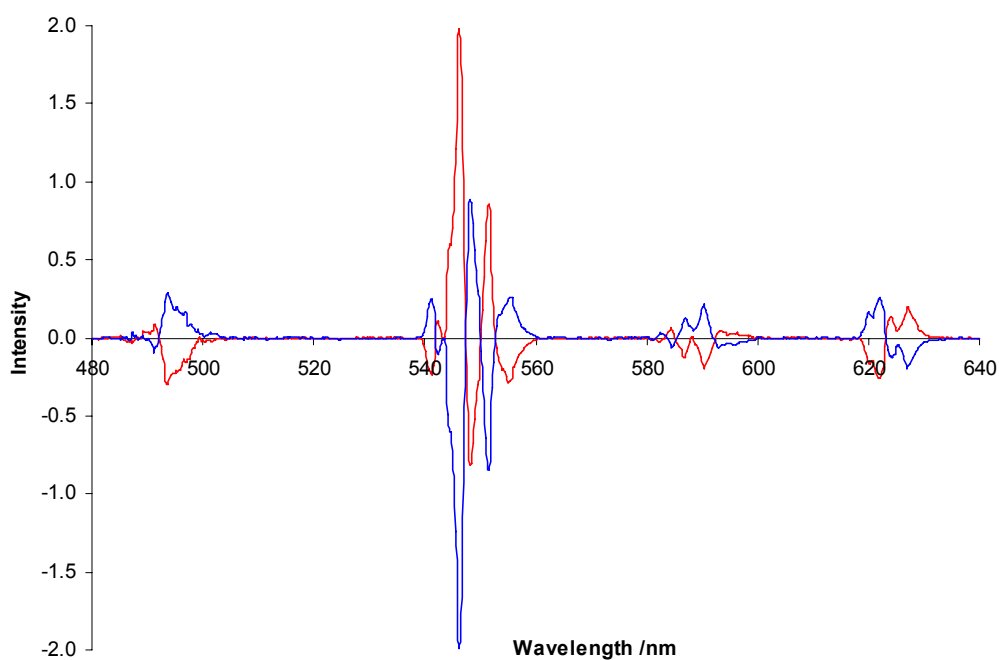

Figure 2

Mirror image CPL spectra for (SSS)- $\Delta$ -[Tb.L<sup>1a</sup>]<sup>3+</sup> and (RRR)- $\Lambda$ -[Tb.L<sup>2a</sup>]<sup>3+</sup>; (red = ( $\Delta$ ), blue = ( $\Lambda$ ); 295K, D<sub>2</sub>O, 15 $\mu$ M)

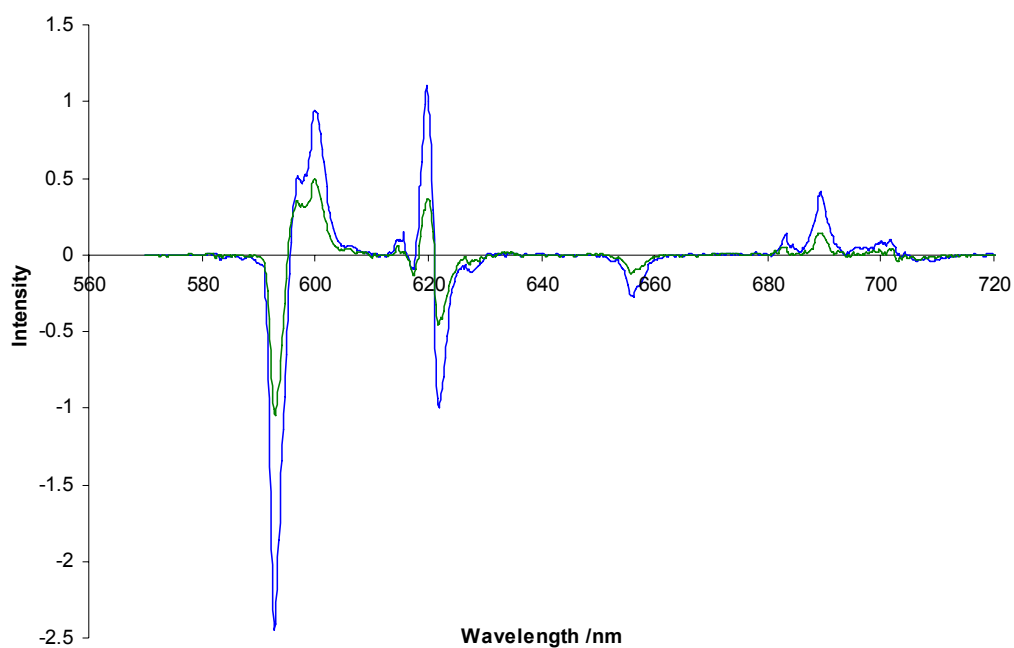

Figure 3

CPL spectra for  $(RRR)\text{-}\Lambda\text{-}[\text{Eu.L}^{2a}]^{3+}$ ; (295K,  $\text{D}_2\text{O}$ ,  $15\mu\text{M}$ ) in the presence and absence of one equivalent of BSA (blue = without; green = with BSA)

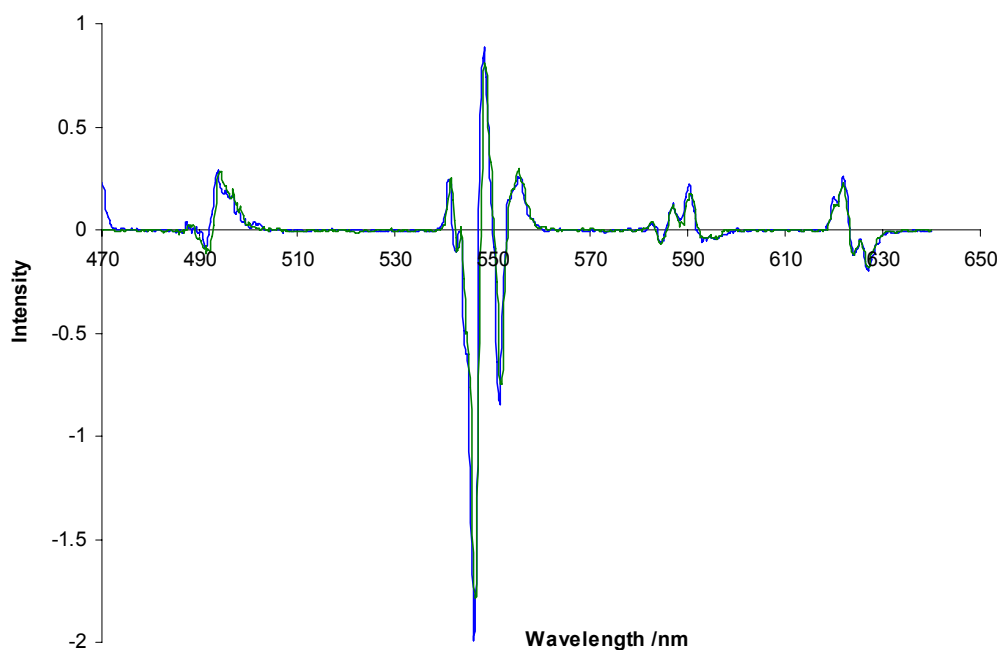

Figure 4

CPL spectra for  $(RRR)\text{-}\Lambda\text{-}[\text{Tb.L}^{2a}]^{3+}$ ; (295K,  $\text{D}_2\text{O}$ ,  $15\mu\text{M}$ ) in the presence and absence of one equivalent of BSA (blue = without; green = with BSA)

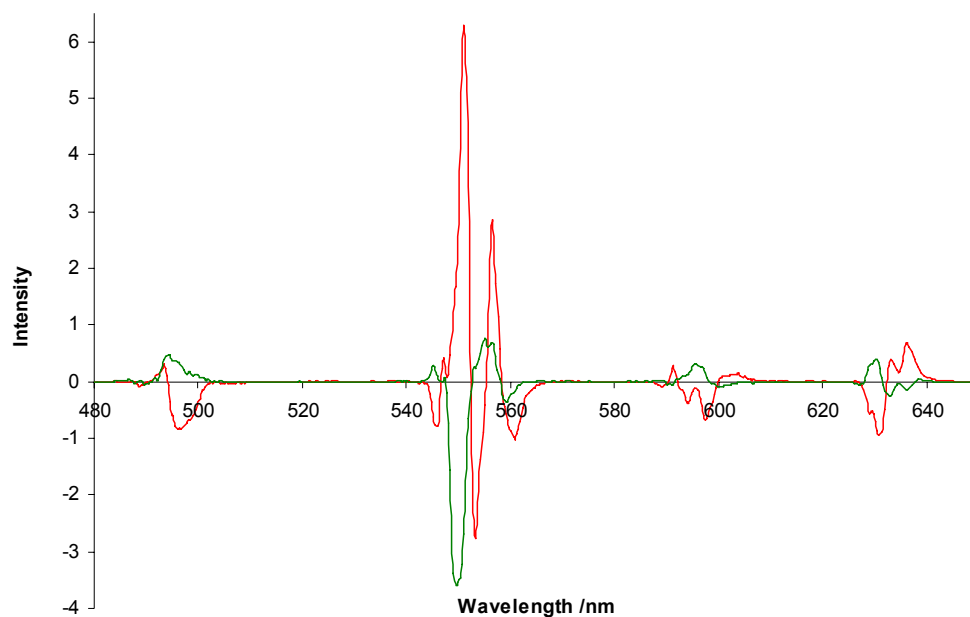

Figure 5

CPL spectra for (SSS)- $\Delta$ -[Tb.L<sup>1b</sup>]<sup>3+</sup>; (295K, D<sub>2</sub>O, 15 $\mu$ M) in the presence and absence of one equivalent of BSA (red = without; green = with BSA)

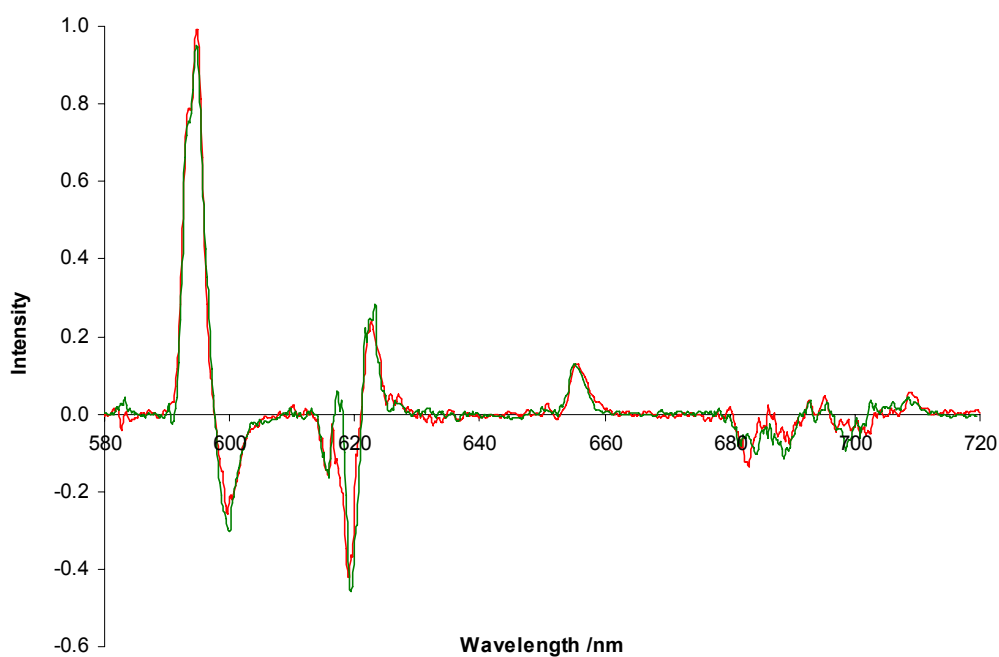

Figure 6

CPL spectra for (SSS)- $\Delta$ -[Eu.L<sup>3</sup>]<sup>3+</sup>; (295K, D<sub>2</sub>O, 15 $\mu$ M) in the presence and absence of 10 equivalents of BSA (red = without; green = with BSA); note the absence of any quenching of emission following protein addition.

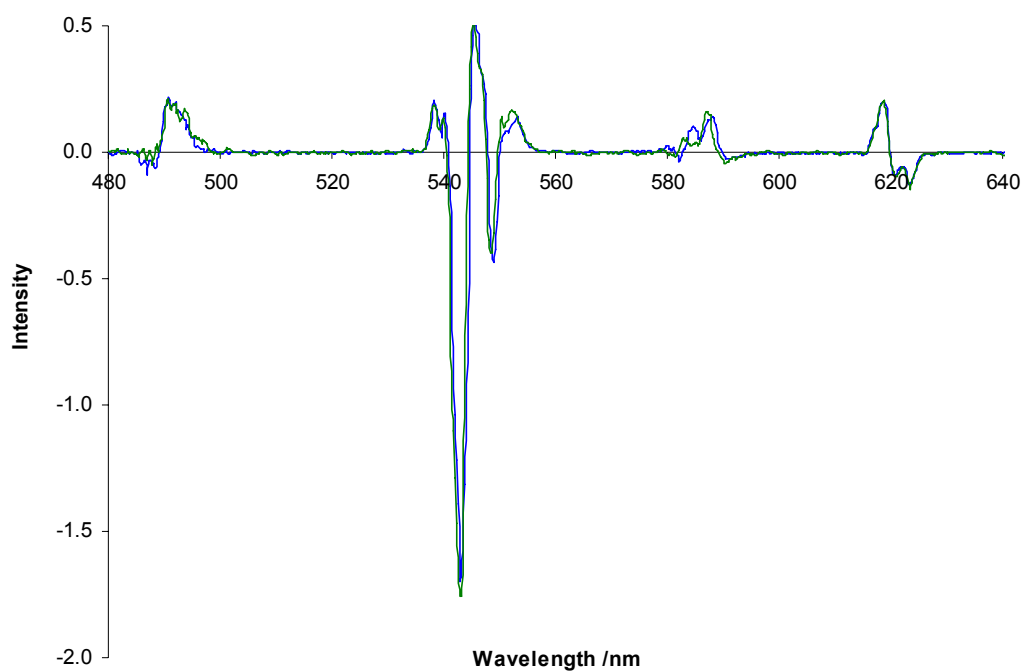

Figure 7

CPL spectra for  $(RRR)\text{-}\Lambda\text{-}[\text{Tb.L}^3]^{3+}$ ; (295K,  $\text{D}_2\text{O}$ ,  $15\mu\text{M}$ ) in the presence and absence of 10 equivalents of BSA (blue = without; green = with BSA)

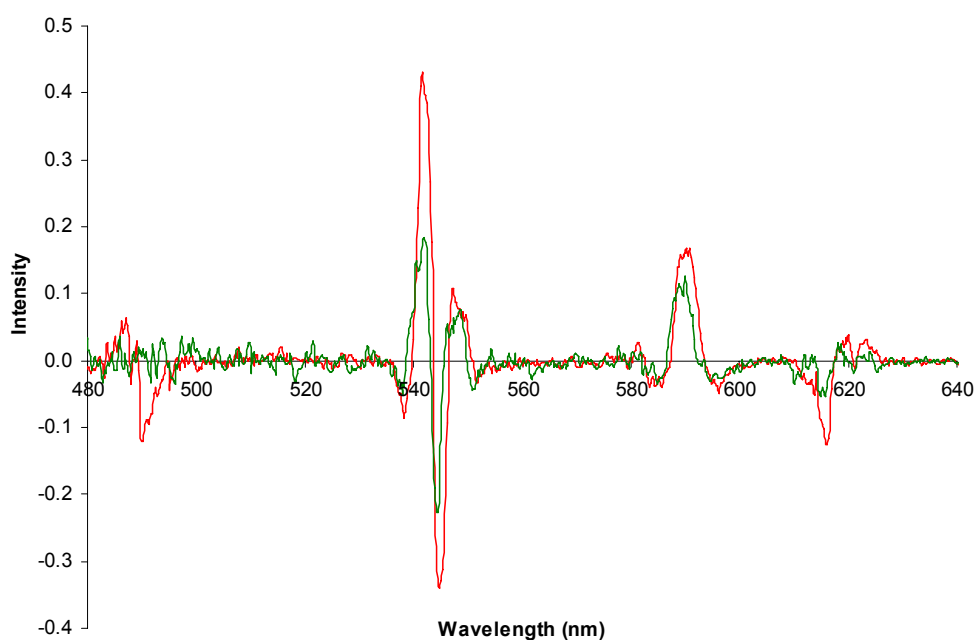

Figure 8

CPL spectra for  $(SSS)\text{-}\Delta\text{-}[\text{Tb.L}^5]^{3+}$ ; (295K,  $\text{D}_2\text{O}$ ,  $15\mu\text{M}$ ) in the presence and absence of 10 equivalents of BSA (red = without; green = with BSA); ligand  $\text{L}^5$  replaces the dpqC chromophore in  $\text{L}^1$  (bidentate moiety) for a unidentate 2-methyl-aza-xanthone moiety, and in this complex the ligand is octadentate and one water molecule is bound in an axial site <sup>13</sup>

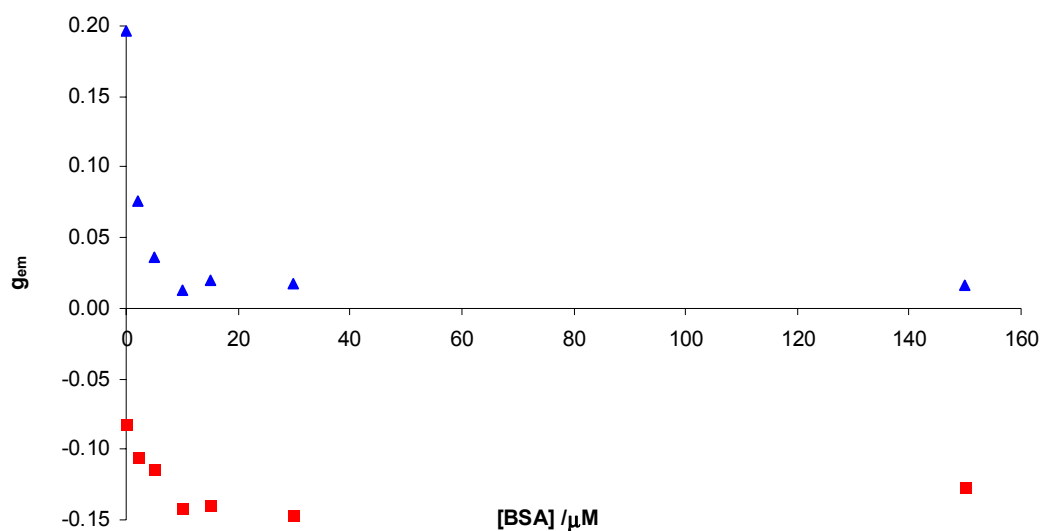

Figure 9

Variation of the observed dissymmetry factor,  $g_{em}$ , with added BSA for  $(SSS)\text{-}\Delta\text{-}[\text{Eu.L}^{1a}]^{3+}$ ; (295K,  $\text{D}_2\text{O}$ ,  $15\mu\text{M}$ ) (blue triangles = 589 nm, red squares = 593 nm).

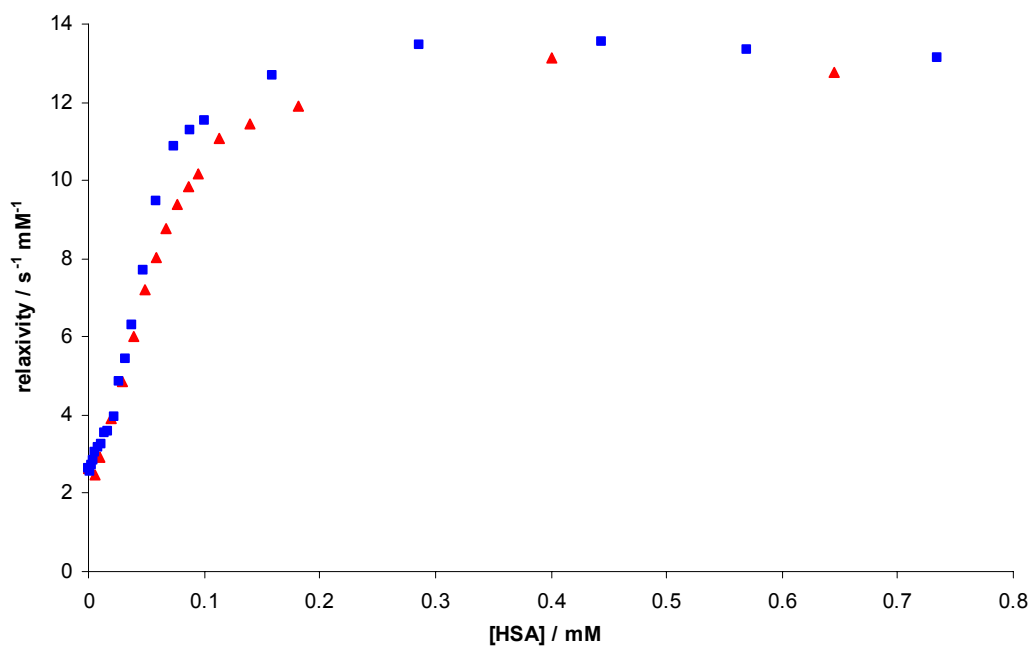

Figure 10

Variation of the measured relaxivity of  $(SSS)\text{-}\Delta\text{-}[\text{Gd.L}^{1a}]^{3+}$  and  $(RRR)\text{-}\Lambda\text{-}[\text{Gd.L}^{2a}]^{3+}$ ; (310K,  $\text{D}_2\text{O}$ , 1.6 mM complex) as a function of added HSA (Red triangles = ( $\Delta$ ), blue squares = ( $\Lambda$ )).

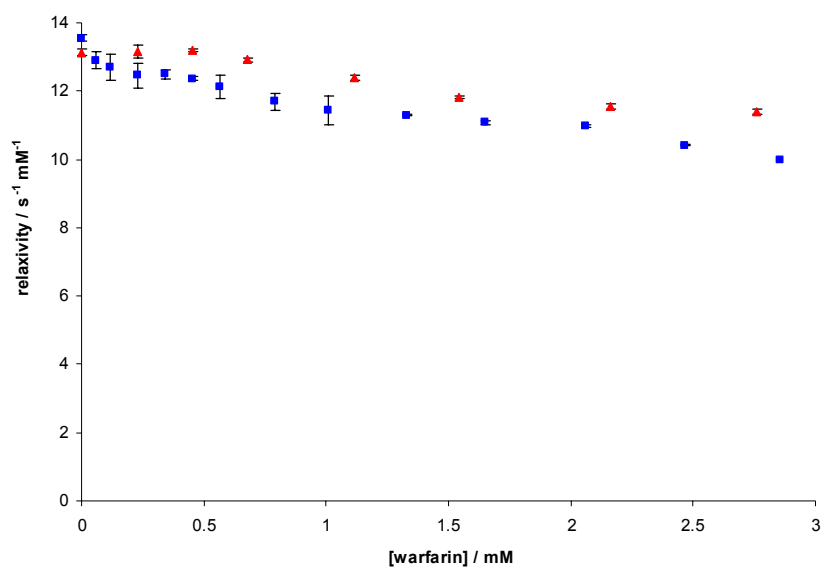

Figure 11

Variation of the measured relaxivity of  $(SSS)\text{-}\Delta\text{-}[\text{Gd.L}^{1a}]^{3+}$  and  $(RRR)\text{-}\Lambda\text{-}[\text{Gd.L}^{2a}]^{3+}$ ; (310K, D<sub>2</sub>O, 1.6 mM complex) as a function of added warfarin (Red triangles =  $\Delta$ ), blue squares =  $\Lambda$ ).

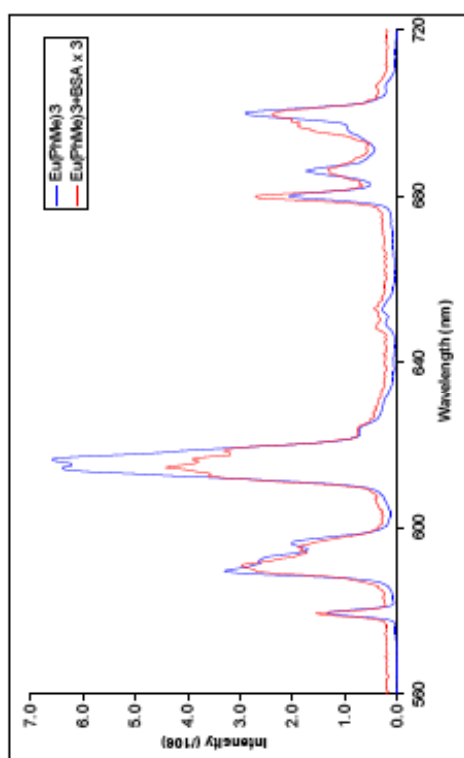

Figure 12

Total emission spectra for  $(SSS)\text{-}\Delta\text{-}[\text{Eu.L}^{1a}]^{3+}$ ; (295K, D<sub>2</sub>O, 15 $\mu$ M) in the presence (red; scaled x 3) and absence (blue) of 10 equivalents of BSA, showing changes in spectral form in the  $\Delta J = 1$  and  $\Delta J = 2$  and 4 manifolds.
